# Supplementary material
Source: PubMed Central journal article supplement (PMC521111)
Supplement: pnas_101_39_14002__1.pdf [file pnas_101_39_14002__1.pdf]

## Supporting Materials and Methods

Analysis of time profiles based on the multistep hopping mechanism was performed with numerical analysis by using MATLAB software. A kinetic model of the multistep hole-transfer process is shown in Scheme 1.

Charge recombination process ( $k_{cr}$ ) can be ignored because the charge-separated state persisted over several hundred microseconds when naphthalimide (NI) and the nearest G are separated by six A bases. According to Scheme 1, simultaneous differential equations are shown as follows:

$$\begin{aligned}\frac{d[G_1]}{dt} &= -k[G_1] + k[G_2] \\ \frac{d[G_2]}{dt} &= k[G_1] - 2k[G_2] + k[G_3] \\ &\vdots \\ \frac{d[G_n]}{dt} &= k[G_{n-1}] - (k + k_1)[G_n] \\ \frac{d[PTZ]}{dt} &= k_1[G_n]\end{aligned}\quad [2]$$

where  $[G_i (i = 1 \dots n)]$  corresponds to the hole population at each G-site,  $k$  is the hole-transfer rate constant between Gs, and  $k_1$  is hole transfer from  $G_n^{*+}$  to PTZ. Fitting results for 5'-(GA) $_n$  and (GT) $_n$  ( $n = 12$ ) according to Eq. 2 are presented in Fig. 8, providing the rate constants of  $k = 4 \times 10^7 \text{ s}^{-1}$  and  $k_1 = 6 \times 10^7 \text{ s}^{-1}$  for (GA) $_{12}$  and  $k = 6.5 \times 10^5 \text{ s}^{-1}$  and  $k_1 = 5 \times 10^6 \text{ s}^{-1}$  for (GT) $_{12}$ , respectively. The obtained values of  $k$  for (GA) $_{12}$  and (GT) $_{12}$  were similar with the values obtained for (GT) $_2$  and (GA) $_2$  with single-exponential analysis according to Eq. 1 in the main text, showing the validity of approximate analysis performed with single-exponential fitting. Difference in the  $k_1$  values between (GA) $_{12}$  and (GT) $_{12}$  is attributed to the difference in the nucleobase that is stacked to PTZ.
