# Supplementary material
Source: PubMed Central journal article supplement (PMC521111)

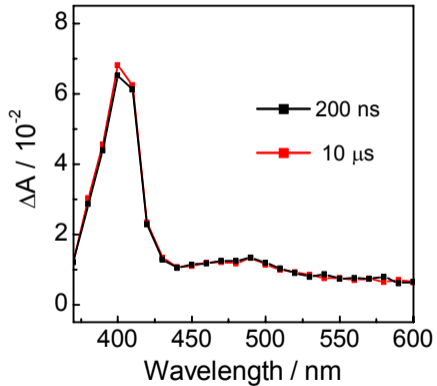

Supplement: pnas_101_39_14002__2.pdf [file pnas_101_39_14002__2.pdf]
